# Supplementary material for: Anion-induced structural diversity in cadmium coordination polymers of 4-aminobenzonitrile: a structural and DFT study
Source: Royal Society of Chemistry journal article supplement (doi:10.1039/d3nj01175e), 2023-01-01
Supplement: d3nj01175e1.pdf [file d3nj01175e1.pdf]

# Anion-induced structural diversity in cadmium coordination polymers of 4-aminobenzonitrile: a structural and DFT study

Behrouz Notash,<sup>\*,a</sup> Ommolbanin Barzegar Tilenoie,<sup>a</sup> S. Shahab Naghavi<sup>b</sup>

<sup>a</sup>Department of Inorganic Chemistry, Shahid Beheshti University, 19839 69411 Tehran, Iran

<sup>b</sup>Department of Physical and Computational Chemistry, Shahid Beheshti University, 1983969411 Tehran, Iran

E-mail: b\_notash@sbu.ac.ir; Fax:+98 2122431663; Tel: +98 2129904363

## Content

|                                                                                          |    |
|------------------------------------------------------------------------------------------|----|
| Figure S1: FT-IR spectrum of compound <b>1</b> .....                                     | 3  |
| Figure S2: FT-IR spectrum of compound <b>2</b> .....                                     | 4  |
| Figure S3: FT-IR spectrum of compound <b>3</b> .....                                     | 5  |
| Figure S4: FT-IR spectrum of compound <b>4</b> .....                                     | 6  |
| Figure S5: FT-IR spectrum of compound <b>5</b> .....                                     | 7  |
| Figure S6: Theoretical calculated FT-IR spectrum of compound <b>1</b> .....              | 8  |
| Figure S7: Theoretical calculated FT-IR spectrum of compound <b>2</b> .....              | 8  |
| Figure S8: Theoretical calculated FT-IR spectrum of compound <b>3</b> .....              | 9  |
| Figure S9: Theoretical calculated FT-IR spectrum of compound <b>4</b> .....              | 9  |
| Figure S10: Theoretical calculated FT-IR spectrum of compound <b>5</b> .....             | 10 |
| Figure S11: PXRD patterns of compound <b>1</b> .....                                     | 10 |
| Figure S12: PXRD patterns of compound <b>2</b> .....                                     | 11 |
| Figure S13: PXRD patterns of compound <b>3</b> .....                                     | 12 |
| Figure S14: PXRD patterns of compound <b>4</b> .....                                     | 13 |
| Figure S15: PXRD patterns of compound <b>5</b> .....                                     | 14 |
| Figure S16. N–H···Br hydrogen bonding interaction in compound <b>2</b> .....             | 15 |
| Figure S17. N–H···O and C–H···O hydrogen bonding interactions in compound <b>3</b> ..... | 15 |
| Figure S18. C–H···O hydrogen bond between adjacent chains in <b>4</b> .....              | 16 |
| Figure S19: Projected density of states (PDOS) of compound <b>1</b> .....                | 16 |

|                                                                           |    |
|---------------------------------------------------------------------------|----|
| Figure S20: Projected density of states (PDOS) of compound <b>2</b> ..... | 17 |
| Figure S21: Projected density of states (PDOS) of compound <b>3</b> ..... | 17 |
| Figure S22: Projected density of states (PDOS) of compound <b>4</b> ..... | 18 |
| Figure S23: Projected density of states (PDOS) of compound <b>5</b> ..... | 18 |
| Figure S24. TGA curves of compound <b>1-5</b> .....                       | 19 |
| Table S1: Selected bond lengths and angles for compound <b>1</b> .....    | 19 |
| Table S2: Selected bond lengths and angles for compound <b>2</b> .....    | 20 |
| Table S3: Selected bond lengths and angles for compound <b>3</b> .....    | 20 |
| Table S4: Selected bond lengths and angles for compound <b>4</b> .....    | 21 |
| Table S5: Selected bond lengths and angles for compound <b>5</b> .....    | 21 |
| Table S6: Hydrogen bond parameters (D-H...A) for compound <b>2</b> .....  | 22 |
| Crystal structure determination and refinement for <b>1-5</b> .....       | 22 |
| Computational methods .....                                               | 23 |
| Reference.....                                                            | 23 |

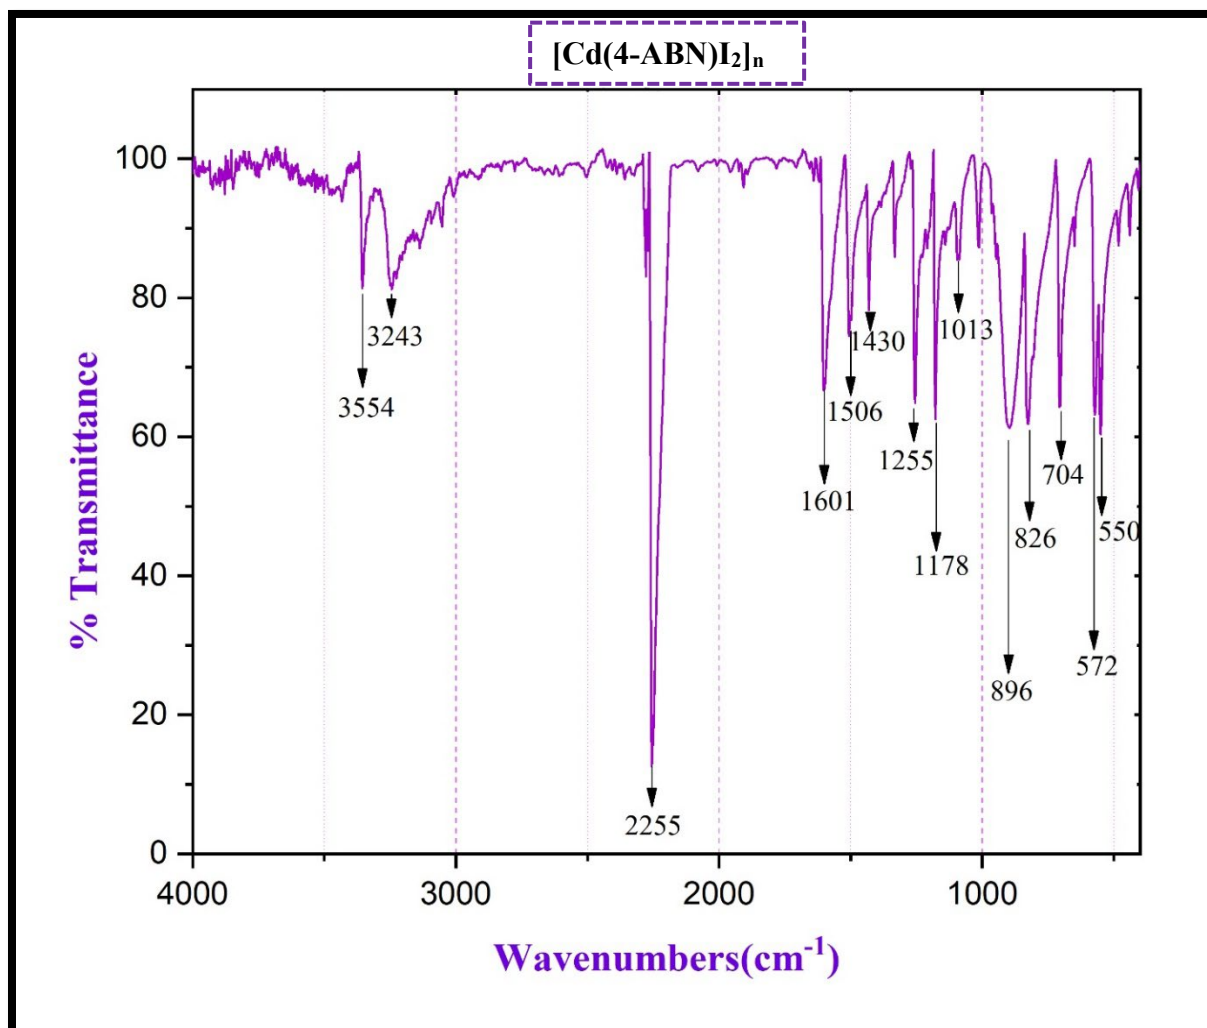

**Figure S1.** FT-IR spectrum of compound **1** in KBr pellet.

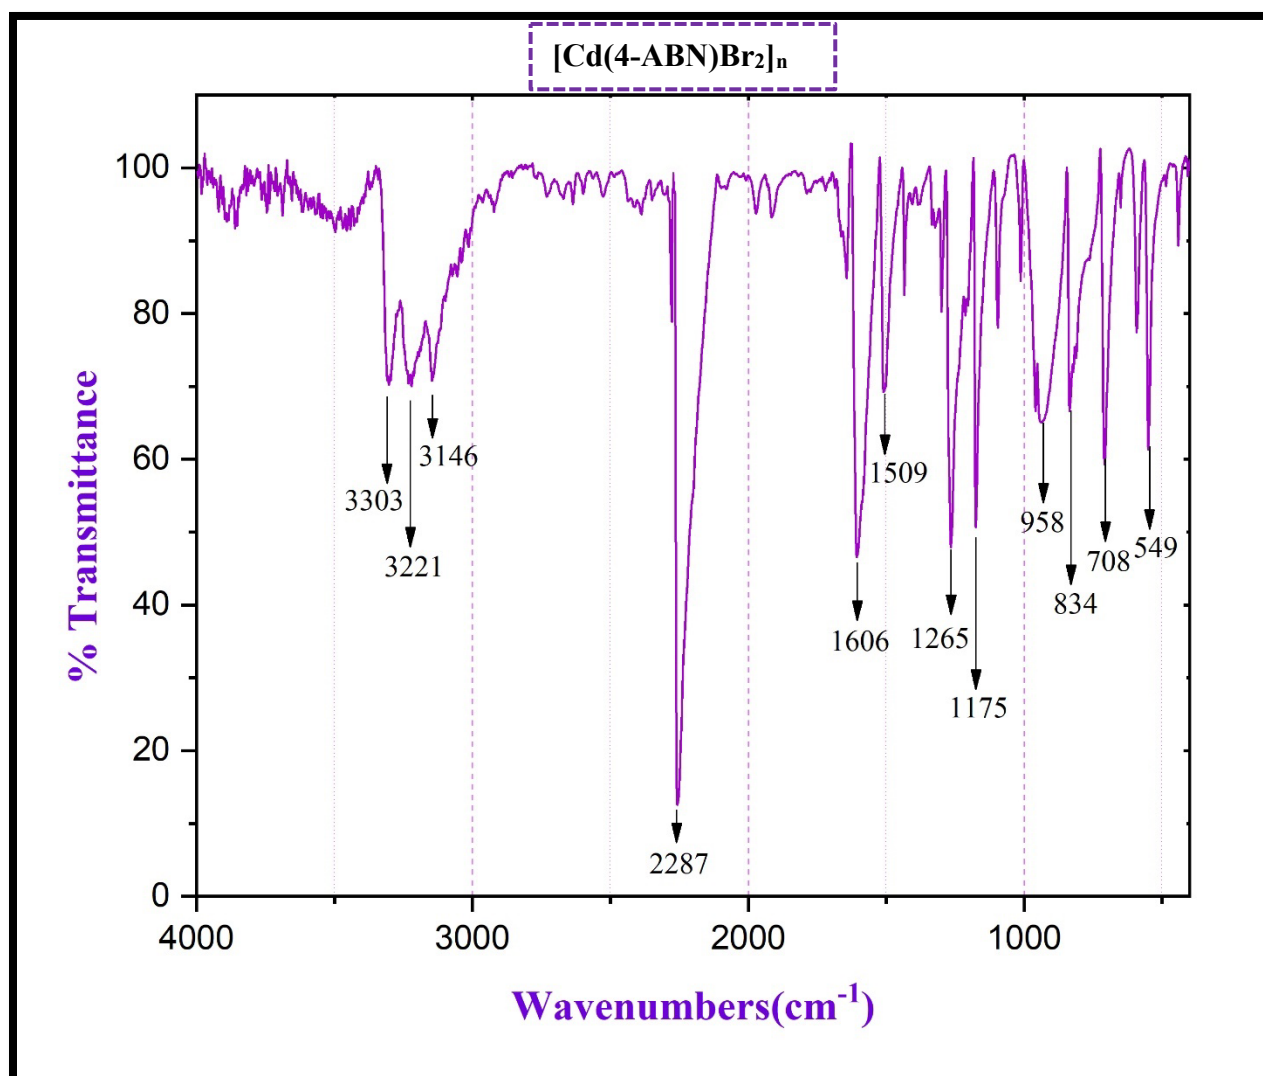

**Figure S2.** FT-IR spectrum of compound **2** in KBr pellet.

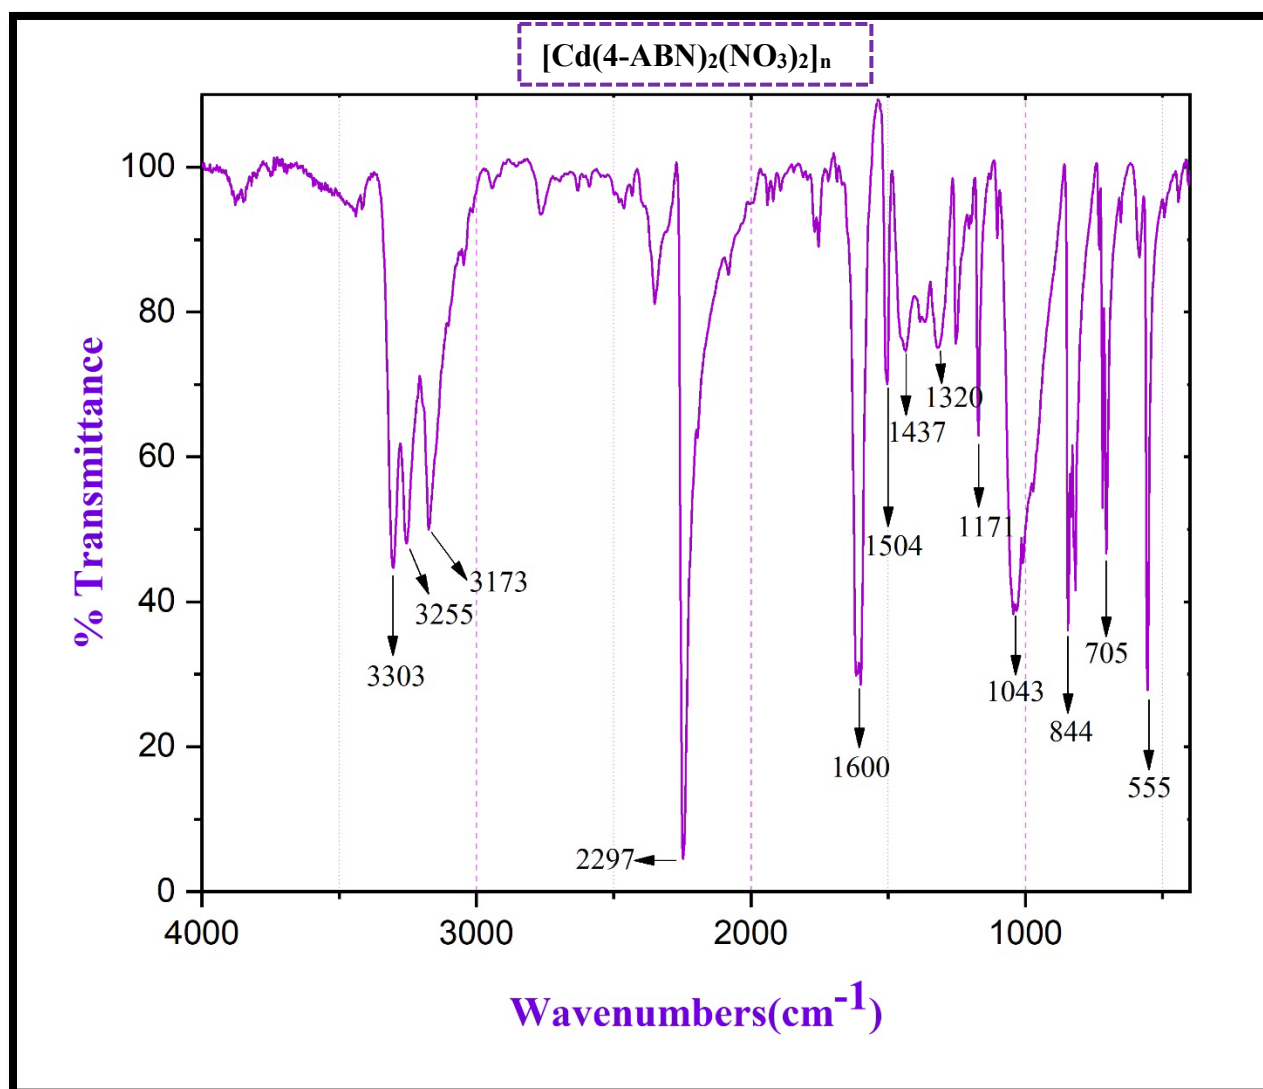

**Figure S3.** FT-IR spectrum of compound **3** in KBr pellet.

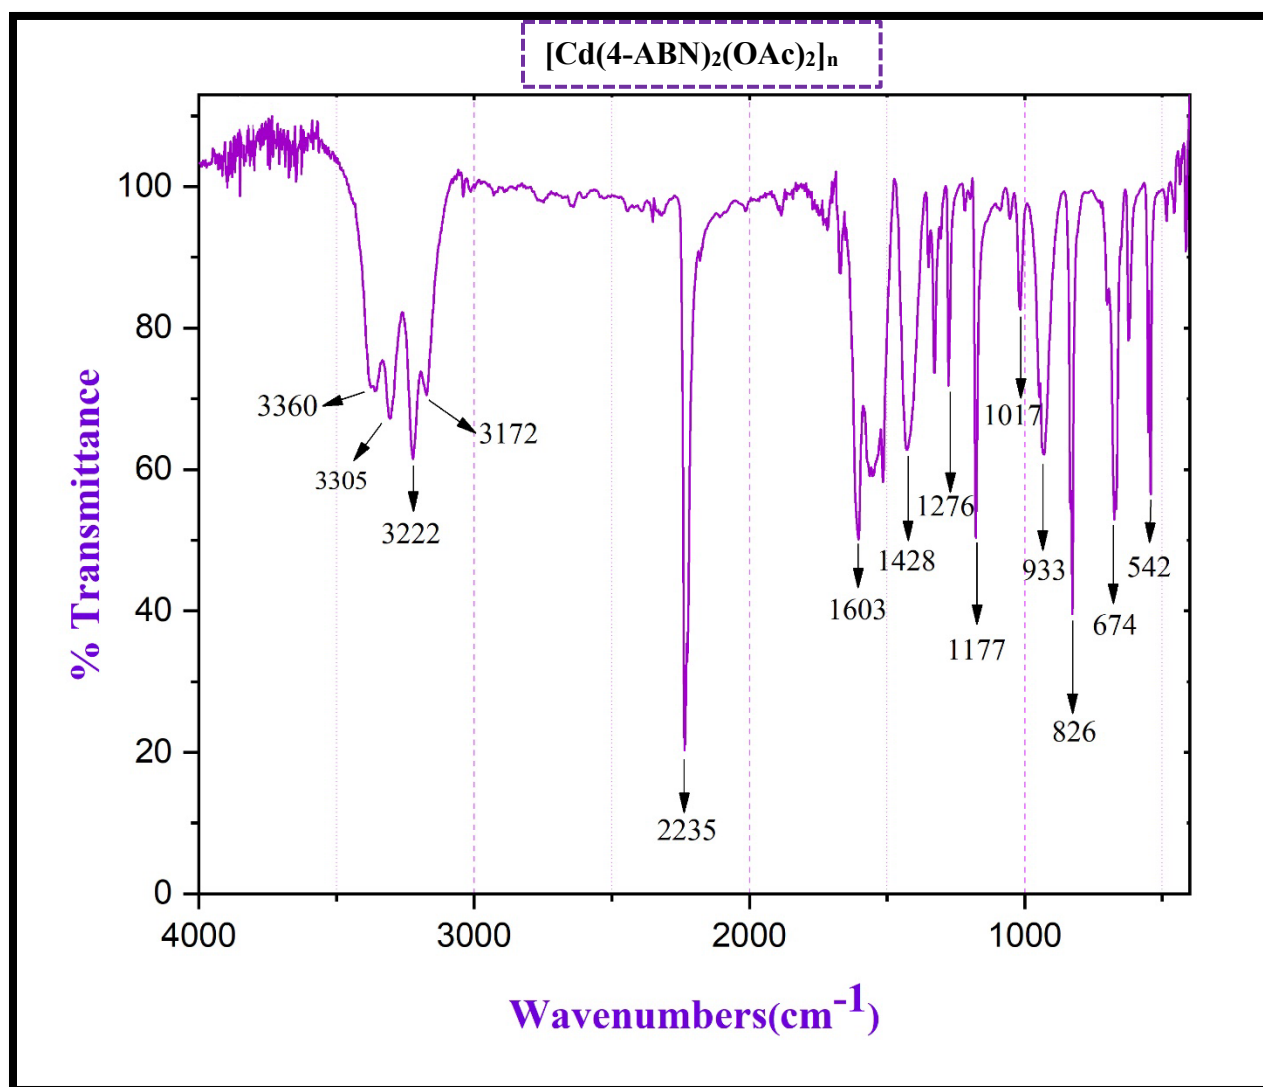

**Figure S4.** FT-IR spectrum of compound **4** in KBr pellet.

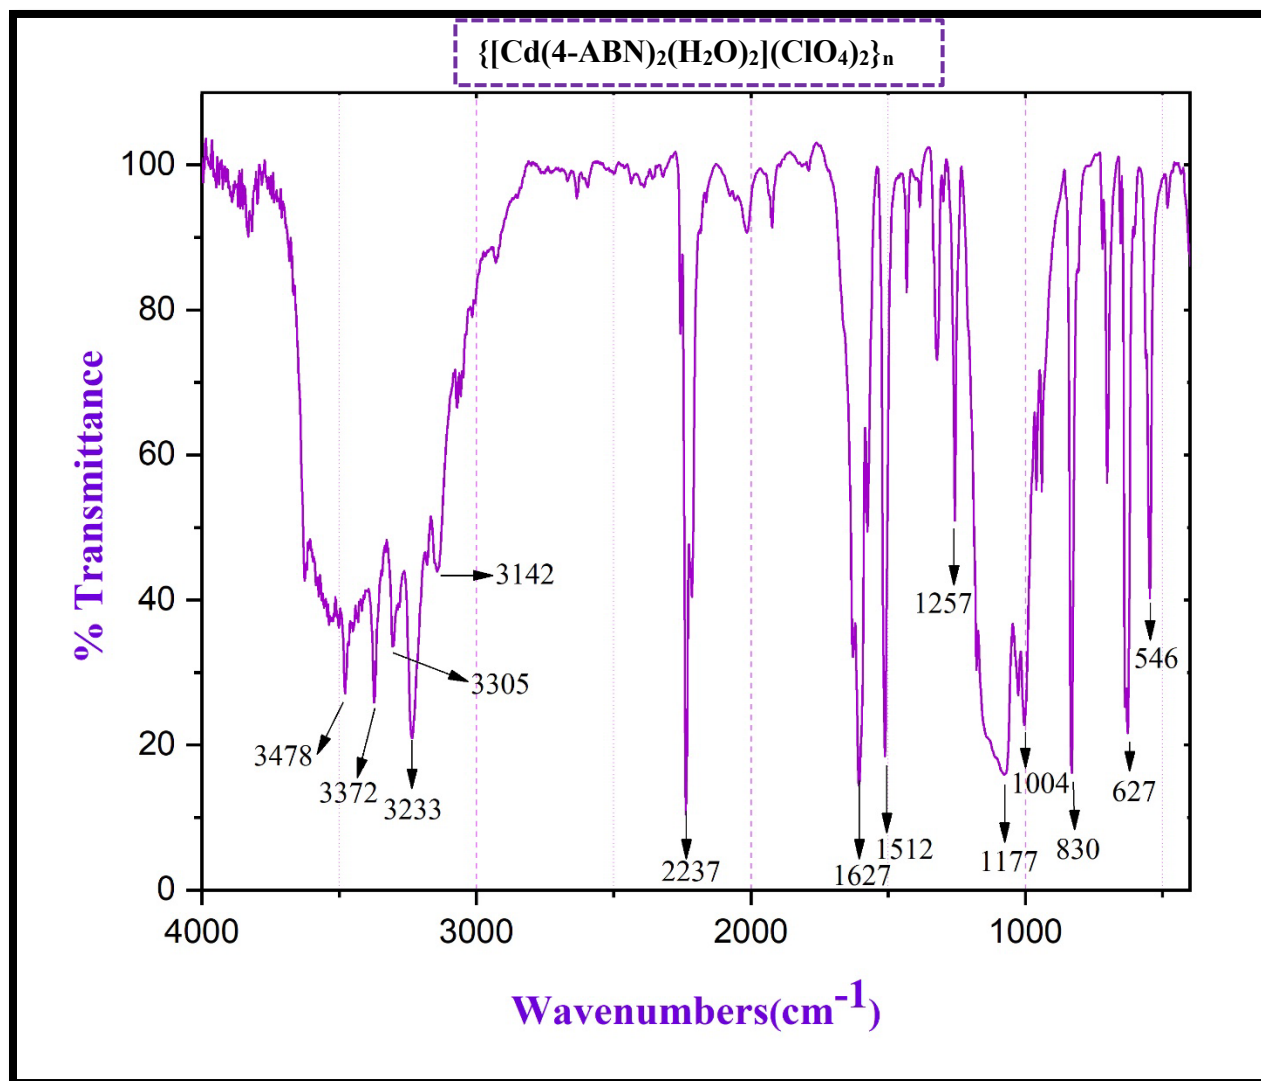

**Figure S5.** FT-IR spectrum of compound 5 in KBr pellet.

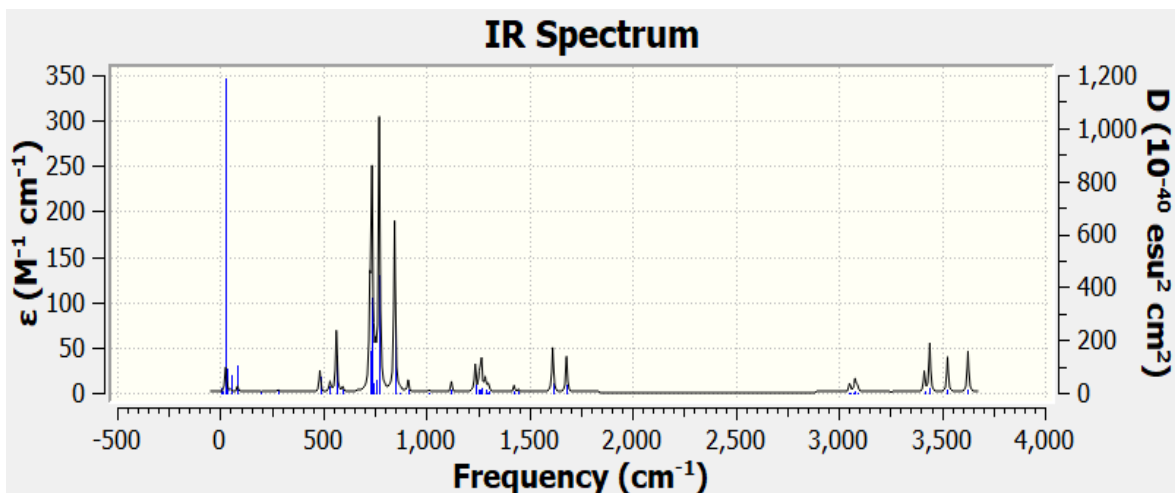

Figure S6. Theoretical calculated FT-IR spectrum of compound 1.

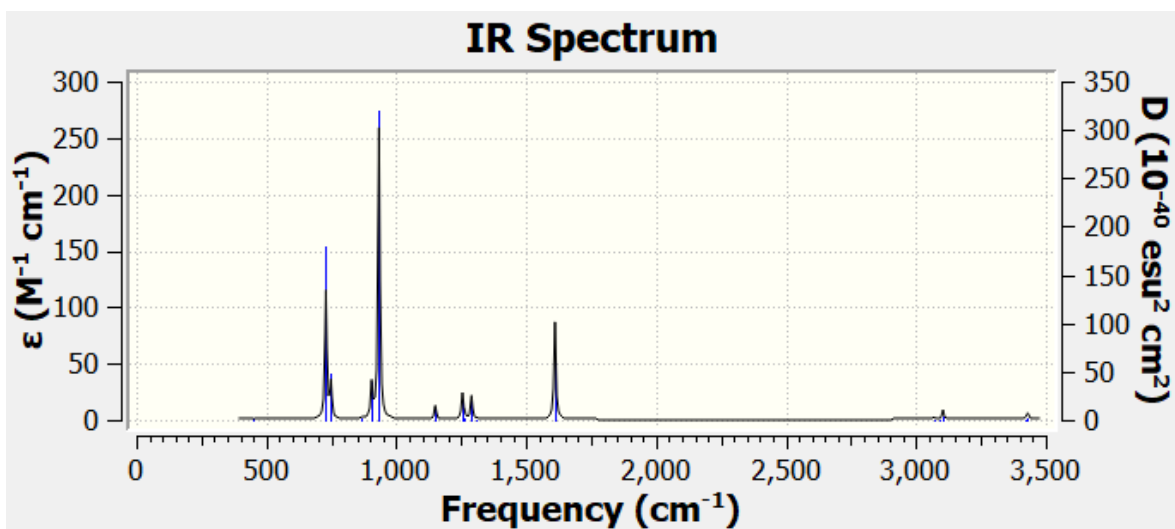

Figure S7. Theoretical calculated FT-IR spectrum of compound 2.



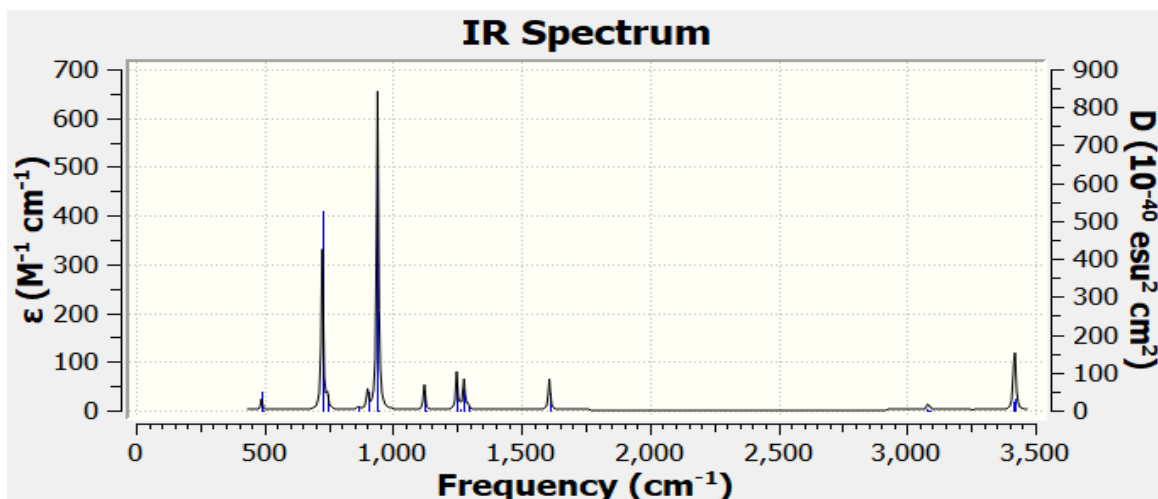

**Figure S8.** Theoretical calculated FT-IR spectrum of compound 3.

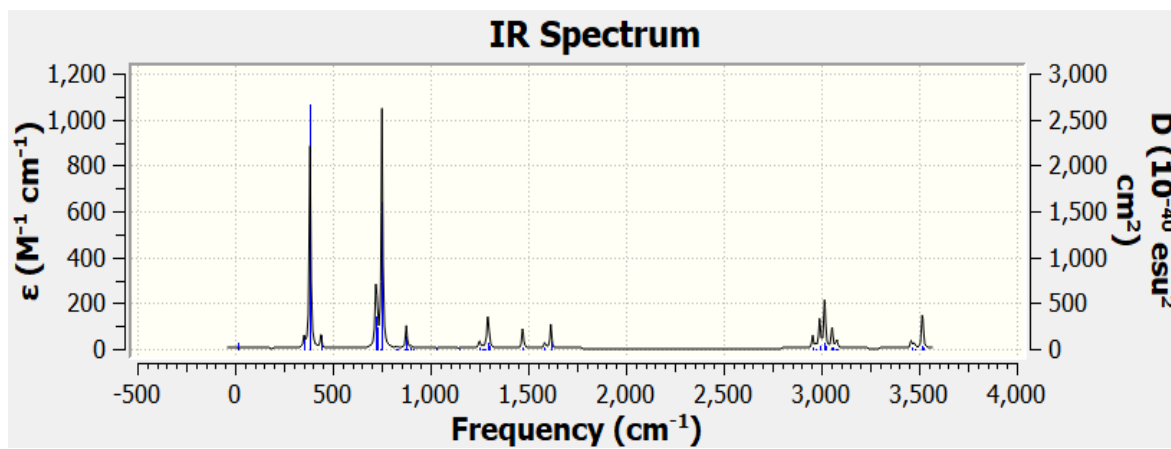

**Figure S9.** Theoretical calculated FT-IR spectrum of compound 4.

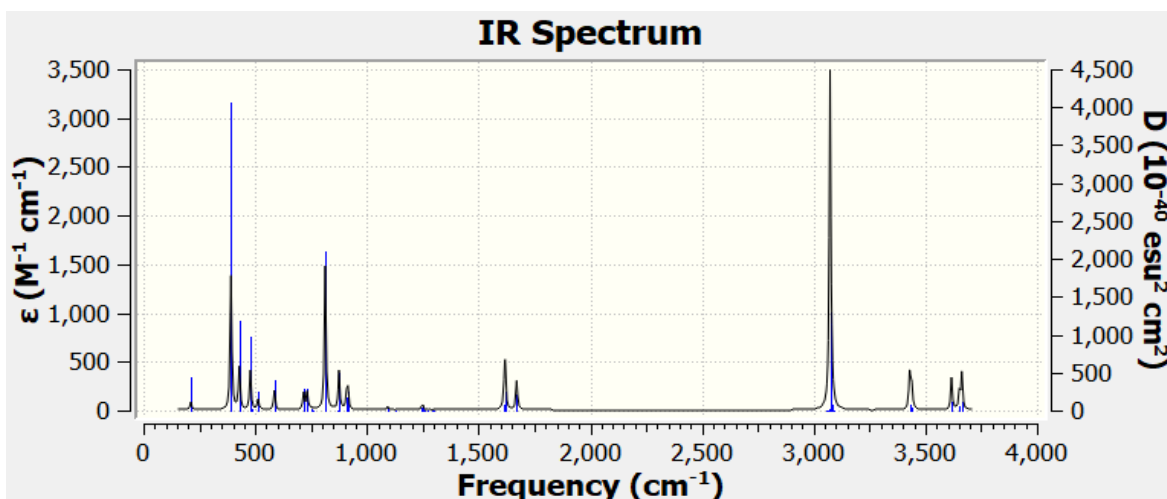

Figure S10. Theoretical calculated FT-IR spectrum of compound 5.

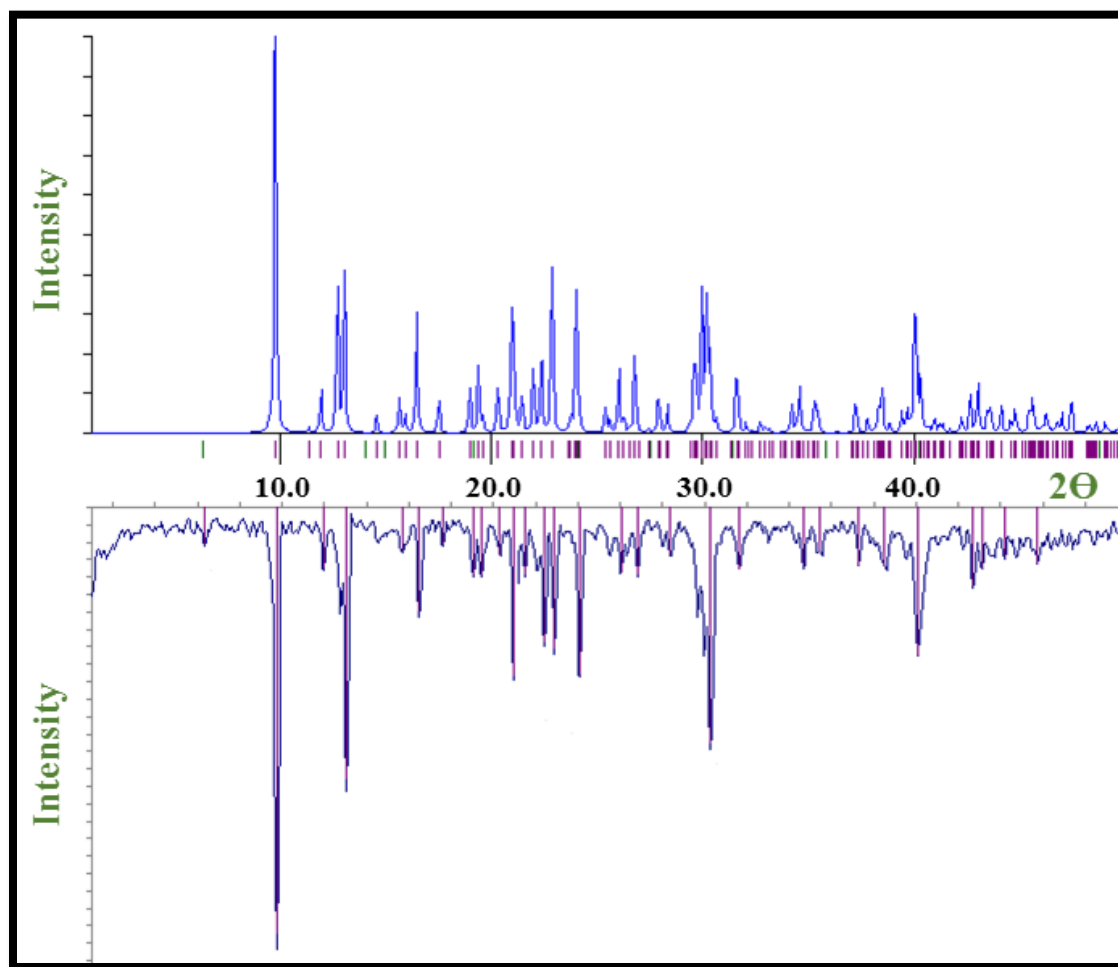

Figure S11. PXRD patterns of compound 1: (top) simulated, (bottom) synthesized.

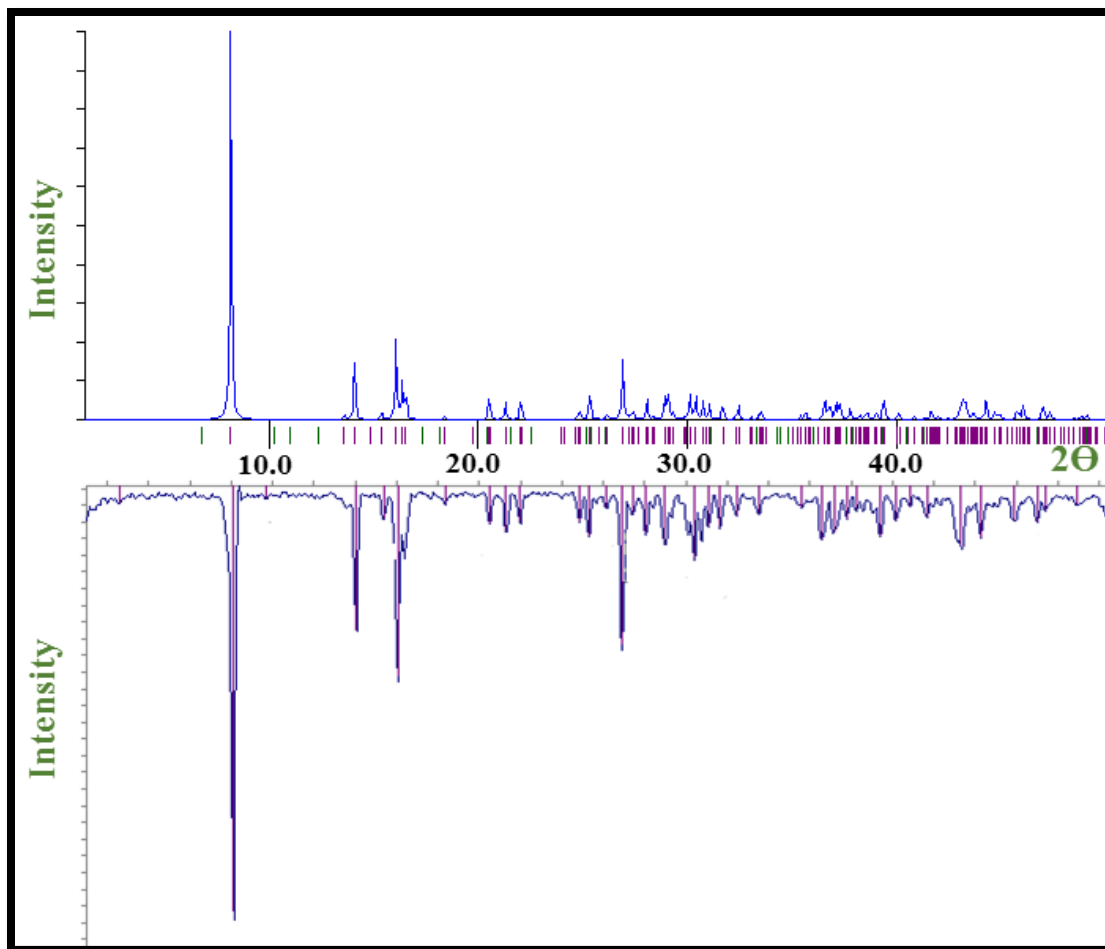

**Figure S12.** PXRD patterns of compound 2: (top) simulated, (bottom) synthesized.

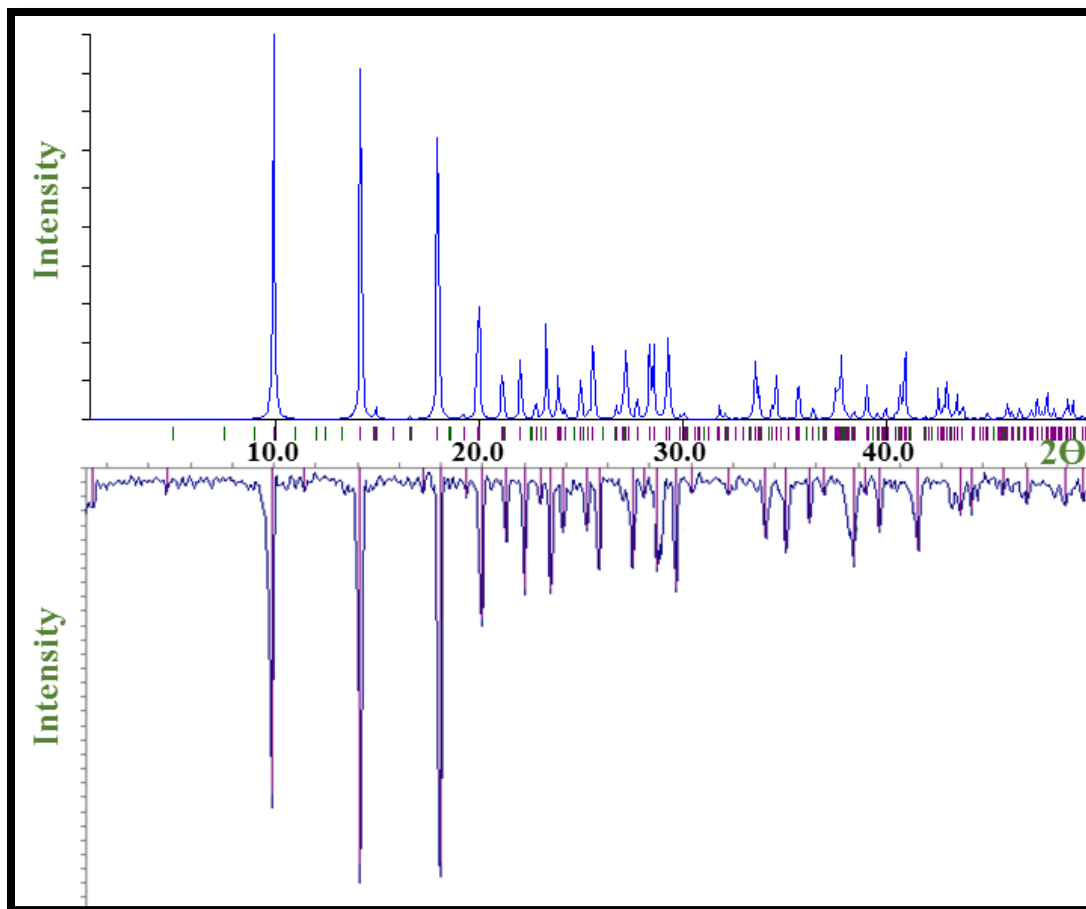

Figure S13. PXRD patterns of compound 3: (top) simulated, (bottom) synthesized.

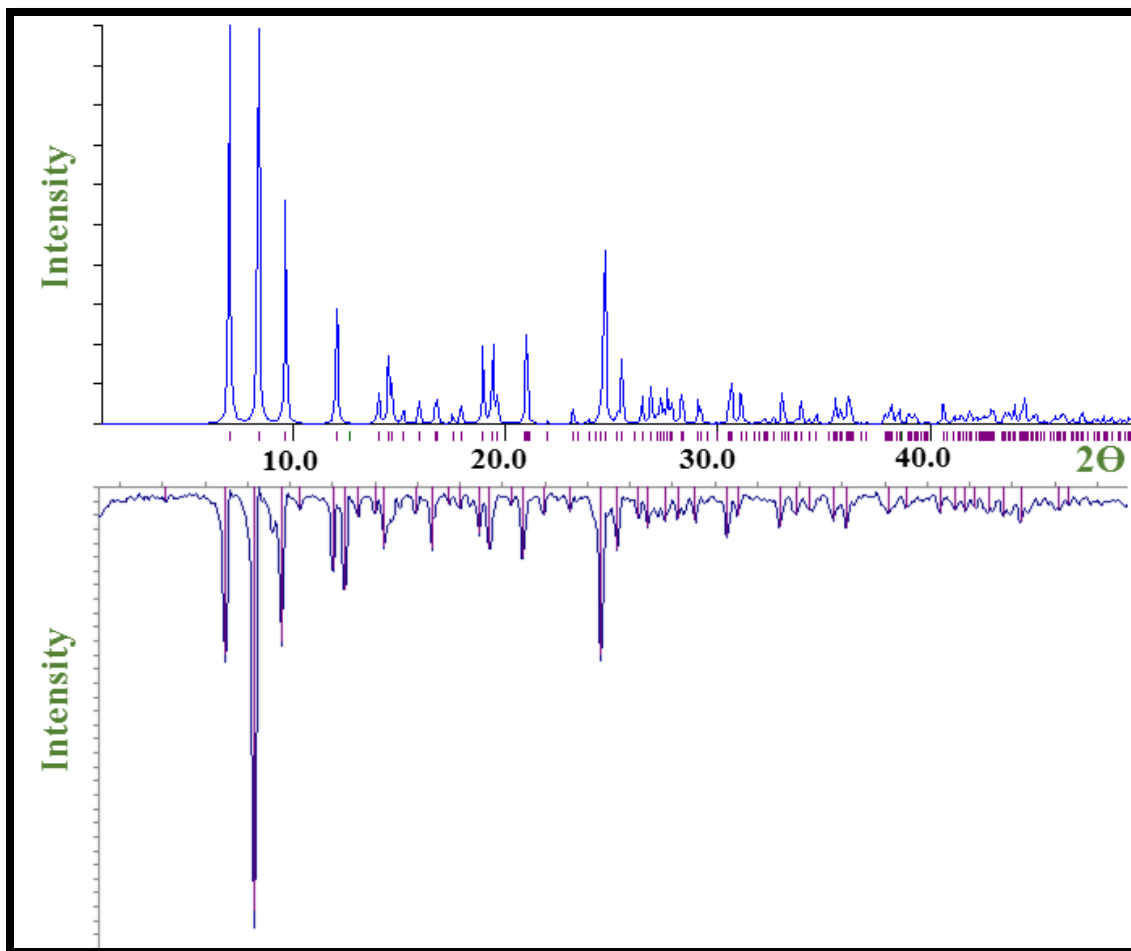

**Figure S14.** PXRD patterns of compound **4**: (top) simulated, (bottom) synthesized.

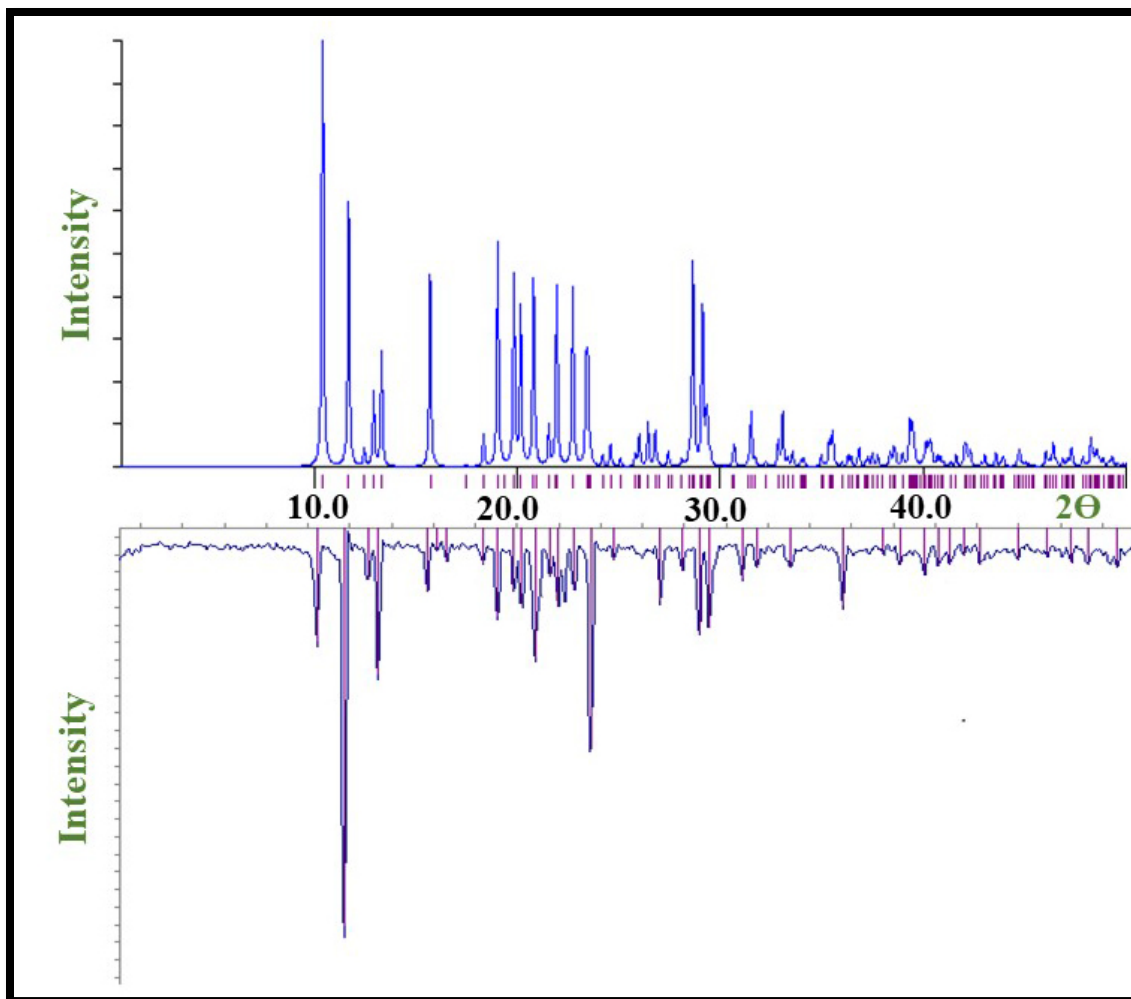

**Figure S15.** PXRD patterns of compound 5: (top) simulated, (bottom) synthesized.

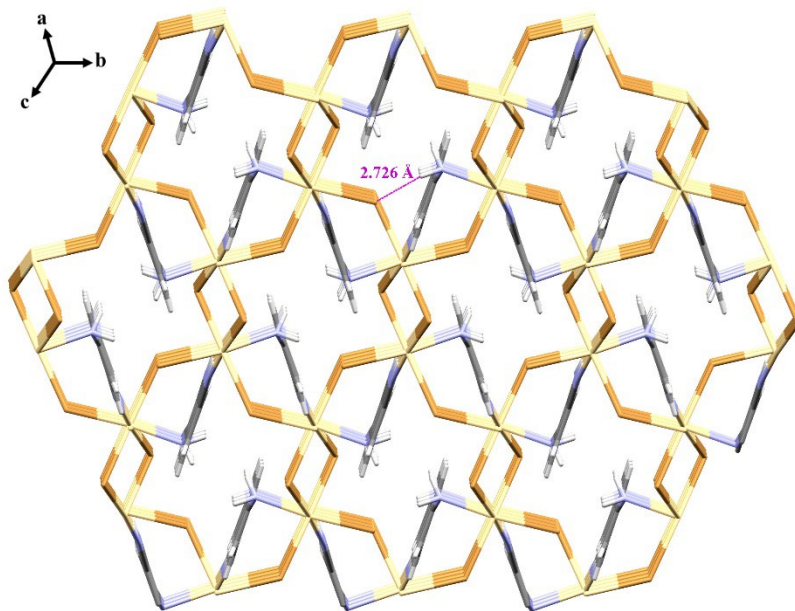

**Figure S16.** N–H···Br hydrogen bonding interaction which is shown in purple dashed lines in **2**.

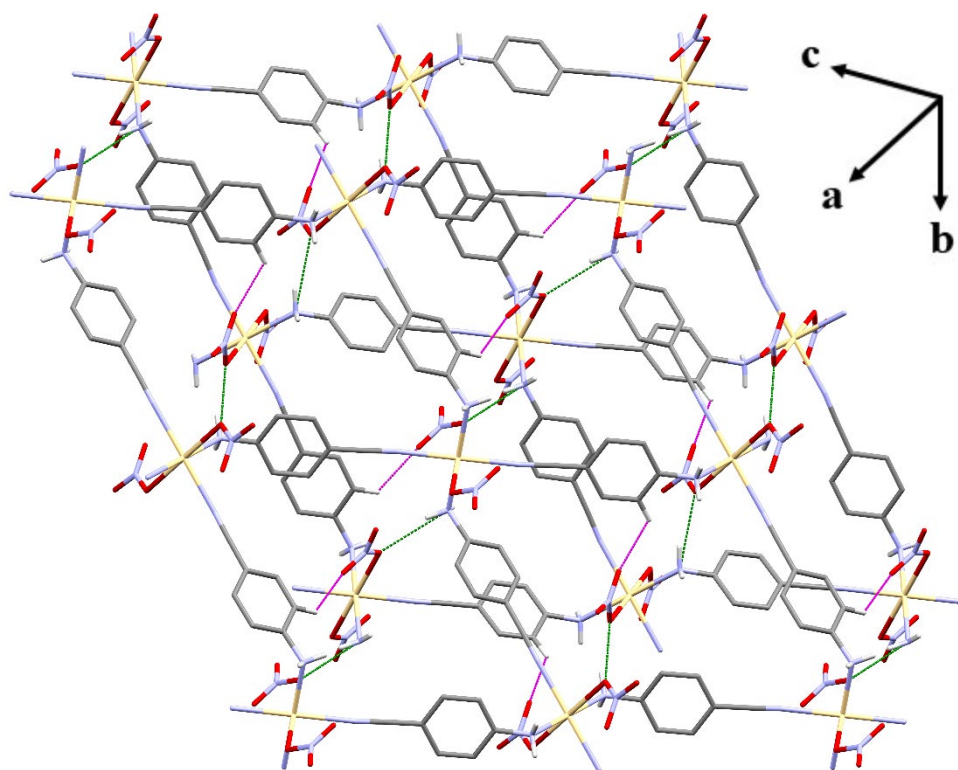

**Figure S17.** (a) N–H···O and C–H···O hydrogen bonding interactions between AB layers in compound **3** which is shown as green and purple dashed lines, respectively.

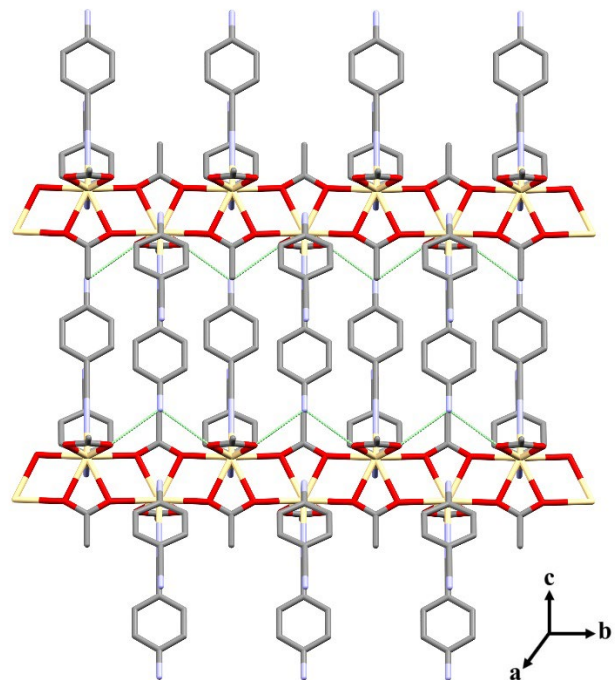

Figure S18. C-H...O hydrogen bond between adjacent chains in **4**.

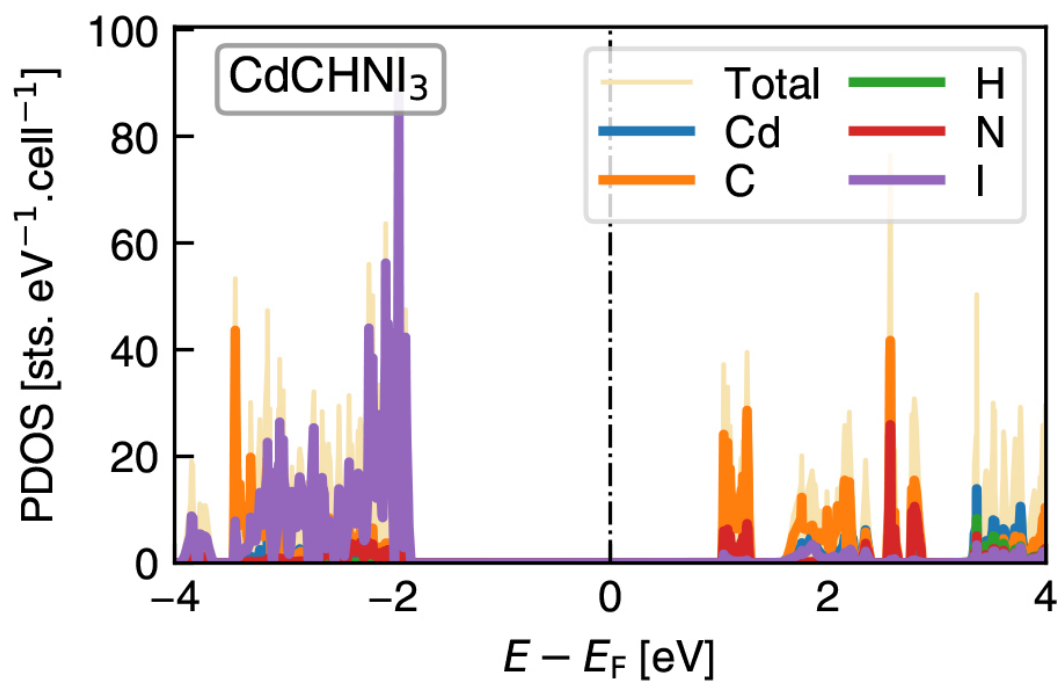

Figure S19. Projected density of states (PDOS) of compound **1**.



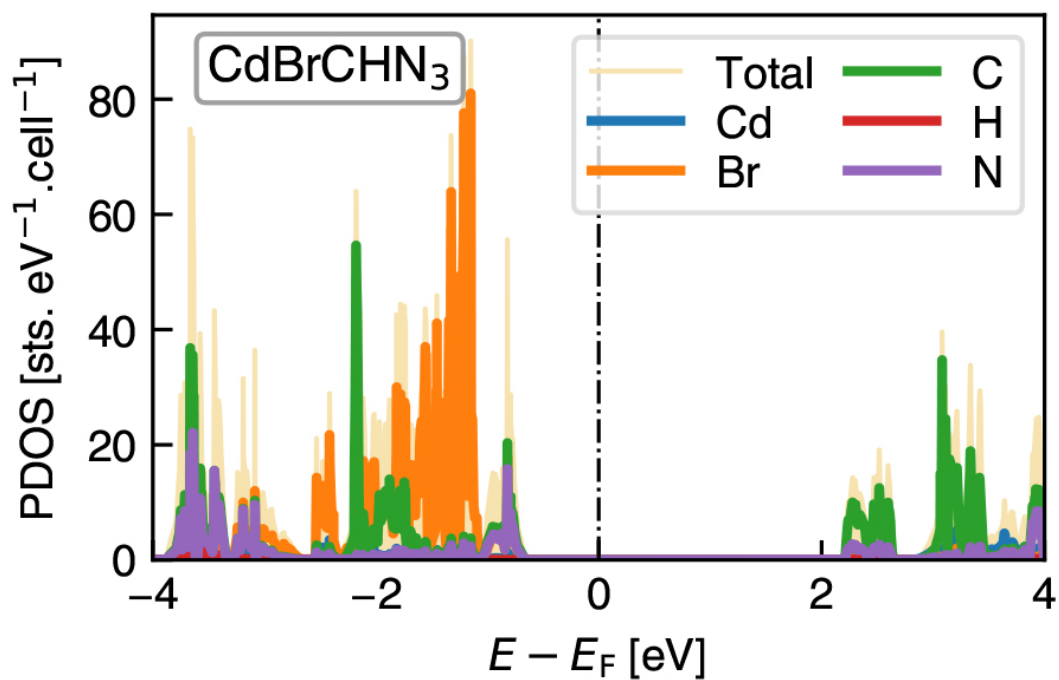

Figure S20. Projected density of states (PDOS) of compound 2.

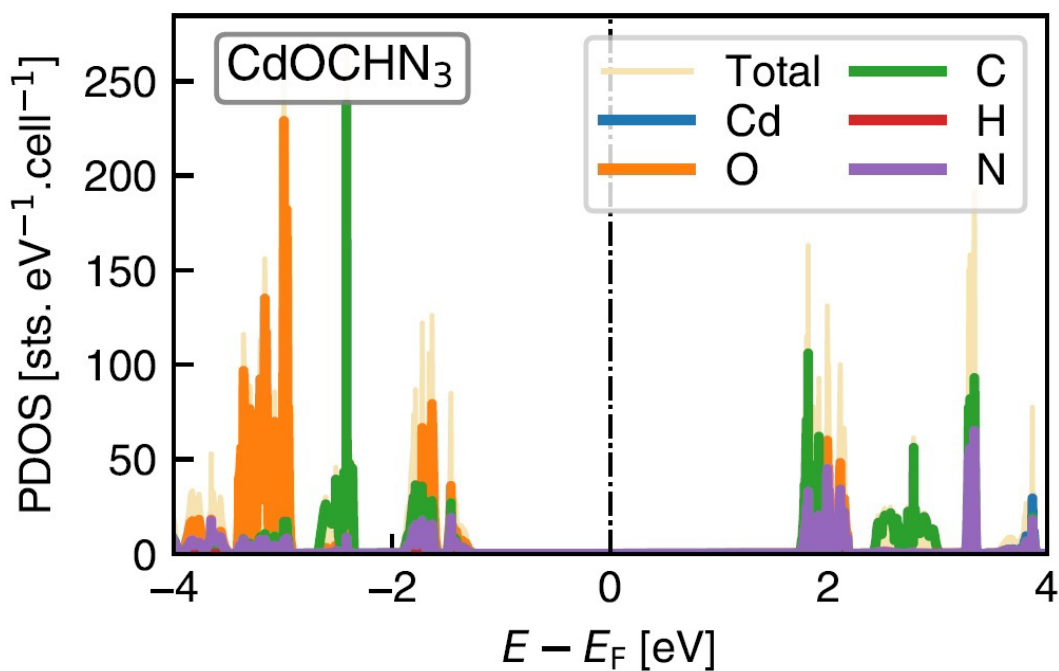

Figure S21. Projected density of states (PDOS) of compound 3.

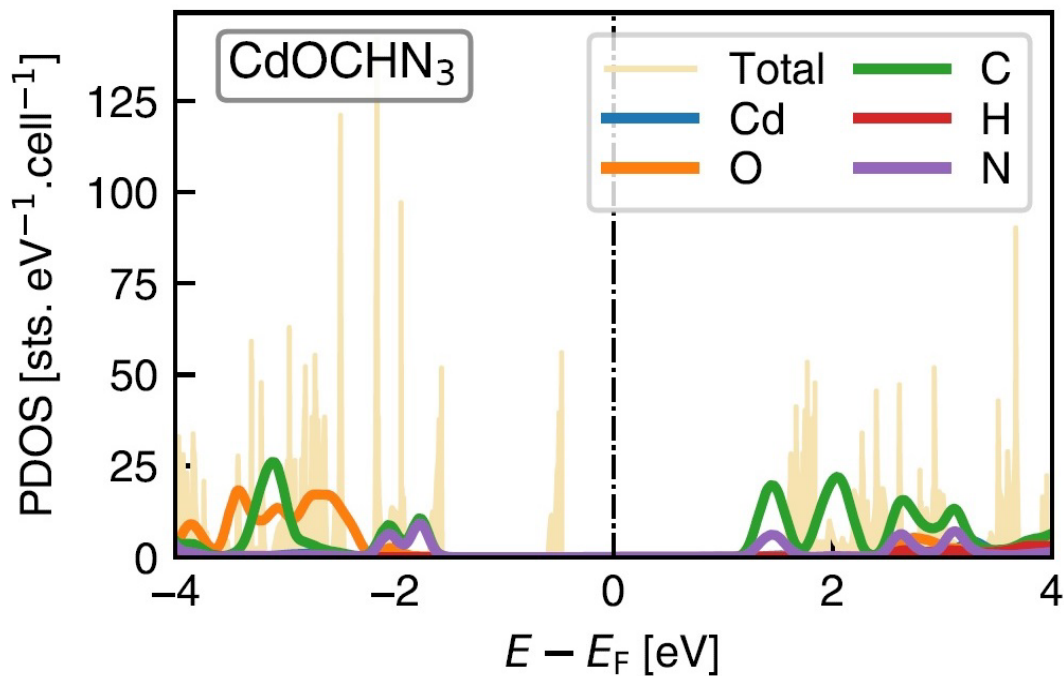

**Figure S22.** Projected density of states (PDOS) of compound 4.

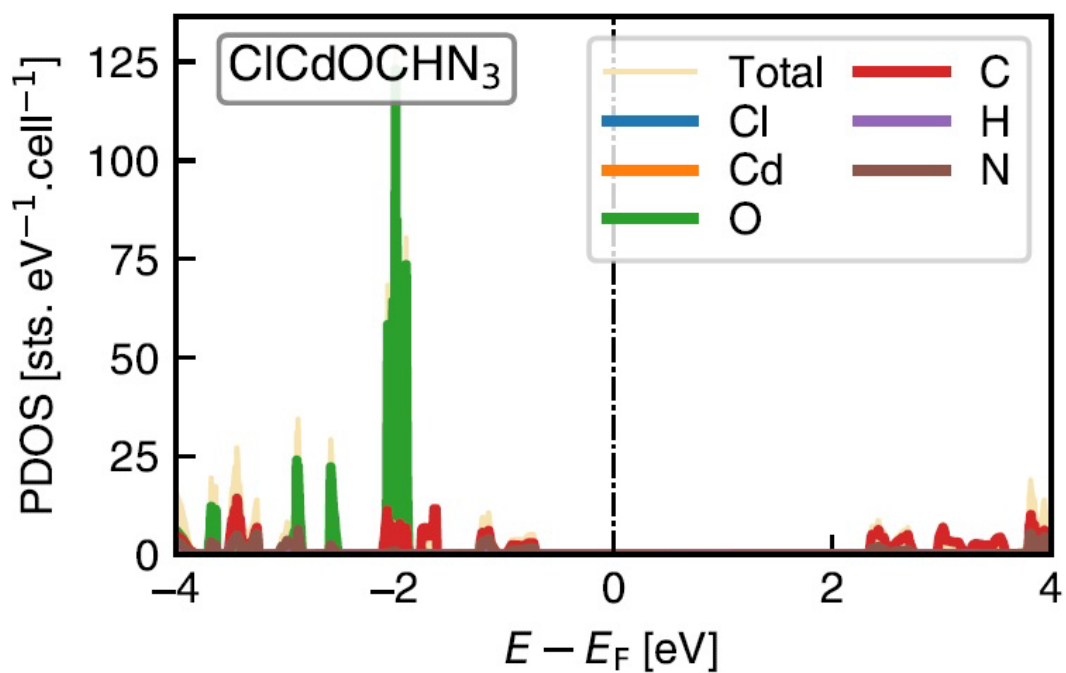

**Figure S23.** Projected density of states (PDOS) of compound 5.

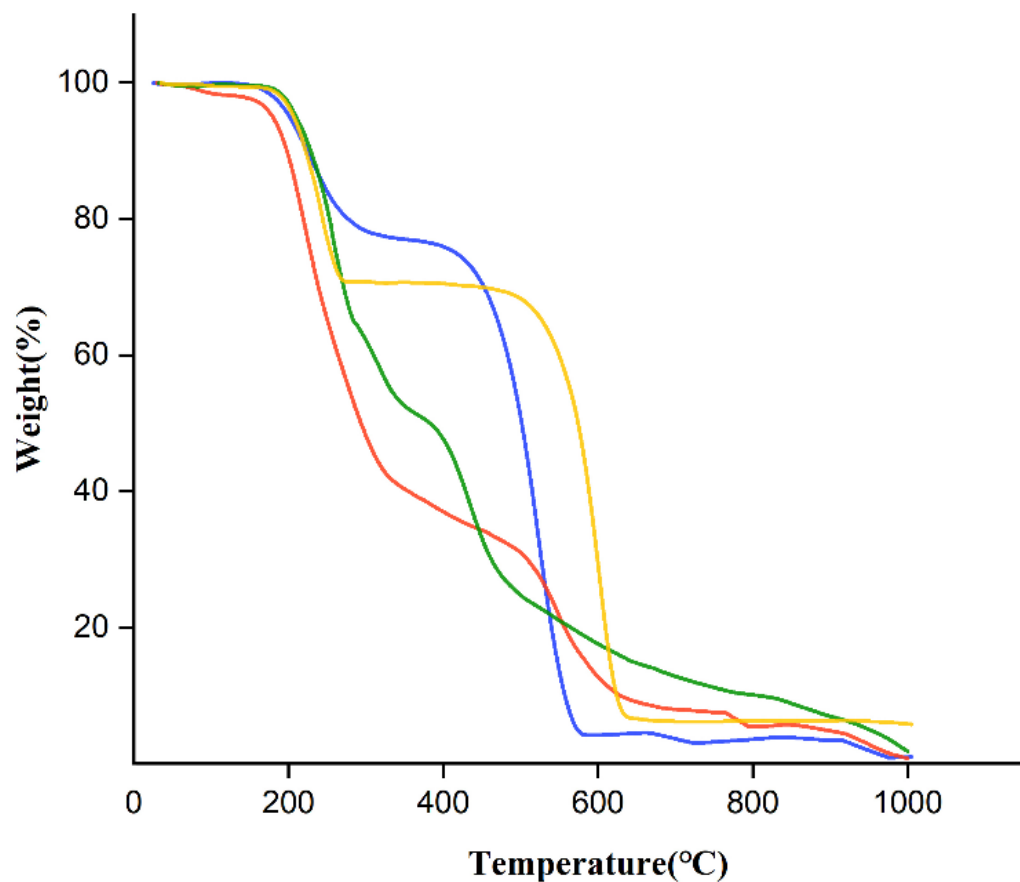

**Figure S24.** TGA curves of compound **1** (blue), **2** (yellow) under Ar atmosphere and **3** (green), **4** (orange) under N<sub>2</sub> atmosphere.

**Table S1.** Selected bond lengths (Å) and angles (°) for compound **1**.

|                                                                               |            |                                              |           |
|-------------------------------------------------------------------------------|------------|----------------------------------------------|-----------|
| Cd(1)-N(2) <sup>#1</sup>                                                      | 2.368(14)  | N(2) <sup>#1</sup> -Cd(1)-N(1) <sup>#3</sup> | 94.3(4)   |
| Cd(1)-N(1)                                                                    | 2.470(9)   | N(2) <sup>#1</sup> -Cd(1)-N(1)               | 85.0 (4)  |
| Cd(1)-I(1)                                                                    | 2.8815(14) | N(2) <sup>#1</sup> -Cd(1)-I(1)               | 169.9(3)  |
| Cd(2)-I(2)                                                                    | 2.7243(13) | N(1)-Cd(1)-N(1) <sup>#3</sup>                | 179.1 (6) |
| Cd(2)-I(1)                                                                    | 2.8555(14) | N(1)-Cd(1)-I(1)                              | 88.7(3)   |
| N(2) <sup>#1</sup> -Cd(1)-N(2) <sup>#2</sup>                                  | 80.3(6)    | N(2) <sup>#2</sup> -Cd(1)-I(1)               | 92.3 (3)  |
| Symmetry codes; #1: x, -y+1, z-1/2, #2: -x+1, -y+1, -z+1, #3: -x+1, y, -z+1/2 |            |                                              |           |

**Table S2.** Selected bond lengths (Å) and angles (°) for compound **2**.

|                                                                                  |           |                                               |           |
|----------------------------------------------------------------------------------|-----------|-----------------------------------------------|-----------|
| Cd(1)-N(2) <sup>#1</sup>                                                         | 2.357(12) | N(2) <sup>#1</sup> -Cd(1)-Br(2) <sup>#2</sup> | 88.8(4)   |
| Cd(1)-N(1)                                                                       | 2.404(14) | N(1)-Cd(1)-Br(2) <sup>#2</sup>                | 85.6(4)   |
| Cd(1)-Br(1)                                                                      | 2.737(2)  | Br(1)-Cd(1)-Br(2) <sup>#2</sup>               | 171.20(6) |
| Cd(1)-Br(2) <sup>#2</sup>                                                        | 2.738(2)  | N(2) <sup>#1</sup> -Cd(1)-Br(2)               | 175.9(4)  |
| Cd(1)-Br(2)                                                                      | 2.747(18) | N(1)-Cd(1)-Br(2)                              | 86.3(3)   |
| Cd(1)-Br(1) <sup>#3</sup>                                                        | 2.755(2)  | Br(1)-Cd(1)-Br(2)                             | 93.93(6)  |
| N(2) <sup>#1</sup> -Cd(1)-N(1)                                                   | 90.4(5)   | Br(2) <sup>#2</sup> -Cd(1)-Br(2)              | 93.39(6)  |
| N(2) <sup>#1</sup> -Cd(1)-Br(1)                                                  | 83.6(4)   | N(2) <sup>#1</sup> -Cd(1)-Br(1) <sup>#3</sup> | 91.7(4)   |
| N(1)-Cd(1)-Br(1)                                                                 | 90.0(4)   | N(1)-Cd(1)-Br(1) <sup>#3</sup>                | 174.4(4)  |
| Symmetry codes; #1: -x+1, y-1/2, -z+3/2, #2: -x, -y, -z+1, #3: -x, y-1/2, -z+3/2 |           |                                               |           |

**Table S3.** Selected bond lengths (Å) and angles (°) for compound **3**.

|                                                          |          |                                              |          |
|----------------------------------------------------------|----------|----------------------------------------------|----------|
| Cd(1)-N(1)                                               | 2.338(6) | N(1)-Cd(1)-O(1)                              | 83.8(2)  |
| Cd(1)-O(1)                                               | 2.341(6) | O(1) <sup>#1</sup> -Cd(1)-O(1)               | 180.0(2) |
| Cd(1)-N(2) <sup>#2</sup>                                 | 2.405(5) | N(1) <sup>#1</sup> -Cd(1)-N(2) <sup>#2</sup> | 89.1(2)  |
| N(1) <sup>#1</sup> -Cd(1)-N(1)                           | 180.0    | N(1)-Cd(1)-N(2) <sup>#2</sup>                | 90.9(2)  |
| N(1)-Cd(1)-O(1) <sup>#1</sup>                            | 96.2(2)  | O(1) <sup>#1</sup> -Cd(1)-N(2) <sup>#2</sup> | 100.3(2) |
| Symmetry codes; #1: -x+2, -y, -z+1, #2: x, -y+1/2, z+1/2 |          |                                              |          |

**Table S4.** Selected bond lengths (Å) and angles (°) for compound **4**.

|                                                                             |           |                                              |            |
|-----------------------------------------------------------------------------|-----------|----------------------------------------------|------------|
| Cd(1)-O(2)                                                                  | 2.457(2)  | N(4)-Cd(1)-O(1)                              | 91.87(14)  |
| Cd(1)-N(4)                                                                  | 2.367(4)  | N(1)-Cd(1)-O(1)                              | 153.28(7)  |
| Cd(1)-N(1)                                                                  | 2.388(5)  | O(1) <sup>#2</sup> -Cd(1)-O(1)               | 52.26(14)  |
| Cd(1)-O(1)                                                                  | 2.448(3)  | N(4)-Cd(1)-O(2)                              | 153.27(6)  |
| N(1)-Cd(1)-O(2) <sup>#1</sup>                                               | 76.60(7)  | N(1)-Cd(1)-O(2)                              | 81.83(12)  |
| N(4)-Cd(1)-N(1)                                                             | 93.69(17) | O(1) <sup>#2</sup> -Cd(1)-O(2) <sup>#2</sup> | 81.51(10)  |
| O(1) <sup>#2</sup> -Cd(1)-O(2) <sup>#3</sup>                                | 78.04(10) | O(1)-Cd(1)-O(2) <sup>#2</sup>                | 103.97(10) |
| N(1)-Cd(1)-O(1) <sup>#2</sup>                                               | 153.28(7) | O(1) <sup>#2</sup> -Cd(1)-O(2) <sup>#1</sup> | 130.01(10) |
| O(1)-Cd(1)-O(2)                                                             | 81.51(10) | O(2)-Cd(1)-O(2) <sup>#1</sup>                | 69.37(9)   |
| N(4)-Cd(1)-O(2) <sup>#1</sup>                                               | 83.93(6)  | O(2) <sup>#2</sup> -Cd(1)-O(2) <sup>#1</sup> | 120.03(6)  |
| Symmetry codes; #1: -x+2, -y, -z+1, #2: x, -y+1/2, z, #3: -x+2, y+1/2, -z+1 |           |                                              |            |

**Table S5.** Selected bond lengths (Å) and angles (°) for compound **5**.

|                                                                     |          |                                              |            |
|---------------------------------------------------------------------|----------|----------------------------------------------|------------|
| Cd(1)-N(2)                                                          | 2.296(4) | N(1) <sup>#1</sup> -Cd(1)-N(1) <sup>#3</sup> | 180.0      |
| Cd(1)-O(1)                                                          | 2.300(4) | O(1)-Cd(1)-O(1) <sup>#2</sup>                | 180.0      |
| Cd(1)-N(1) <sup>#1</sup>                                            | 2.373(4) | N(2)-Cd(1)-O(1) <sup>#2</sup>                | 91.11 (17) |
| Cl(1)-O(2)                                                          | 1.302(6) | N(2)-Cd(1)-N(1) <sup>#1</sup>                | 94.24 (13) |
| Cl(1)-O(4)                                                          | 1.377(7) | N(2) <sup>#2</sup> -Cd(1)-N(1) <sup>#1</sup> | 85.76 (13) |
| Cl(1)-O(3)                                                          | 1.412(6) | O(1)-Cd(1)-N(1) <sup>#1</sup>                | 94.59 (16) |
| Cl(1)-O(5)                                                          | 1.417(6) | O(1) <sup>#2</sup> -Cd(1)-N(1) <sup>#1</sup> | 85.42 (16) |
| N(2)-Cd(1)-N(2) <sup>#2</sup>                                       | 180.0    | N(2)-Cd(1)-O(1)                              | 88.89 (17) |
| Symmetry codes; #1: -x, -y+1, -z, #2; -x, -y+1, -z+1, #3: x, y, z+1 |          |                                              |            |

**Table S6.** Hydrogen bond parameters (D-H...A) for compound **2**.

| D-H...A                               | d (D-H)/Å | d (H...A)/Å | d (D...A)/Å | <(DHA)/° |
|---------------------------------------|-----------|-------------|-------------|----------|
| N(1)-H(1A)...Br(1) <sup>#1</sup>      | 0.87(2)   | 2.73(6)     | 3.541(15)   | 156(13)  |
| Symmetry codes; #1: -x, y+1/2, -z+3/2 |           |             |             |          |

**Crystal structure determination and refinement for 1-5:**

Single-crystal X-ray diffraction measurement for compounds was performed on a STOE IPDS- II diffractometer with graphite-monochromated Mo-K $\alpha$  radiation. Single crystals of **1-5** were mounted on glass fiber and used for data collection. Cell constant and an orientation matrix were obtained from a least-square refinement of the diffraction data from 6127, 4378, 4707, 4474, 4053 reflections for **1-5**, respectively. All data were collected at room temperature to a maximum 2 $\theta$  value of 25° for **1-5**. Diffraction data were collected in a series of  $\omega$  scans in 1° oscillation and integrated using the Stoe X-AREA<sup>1</sup> software package. Numerical absorption correction was applied using X-RED<sup>2</sup> and X-SHAPE<sup>3</sup> software. The data were corrected for Lorentz and polarizing effects. The structures were solved using direct methods<sup>4</sup> and analysis of subsequent difference Fourier maps and then refining F<sup>2</sup> using a full-matrix least-squares procedure with anisotropic displacement parameters.<sup>5</sup> Crystal data and refinement for compounds **1-5** are summarized in Table 1. The atomic factors used were taken from the international tables for X-ray crystallography.<sup>6</sup> All improvements were performed using the X-STEP 32 crystallographic software package.<sup>7</sup>

## Computational methods

We used ultrasoft pseudopotentials of the Vanderbilt type<sup>8-9</sup> using kinetic energy and charge density cutoff energy of 50 and 500 Ry. The Brillouin zone was sampled with 2×2×1 Monkhorst–Pack<sup>10</sup> *k*-point meshes and three times higher for the non-self-consistent calculations. The molecular crystal was fully relaxed for the lattice vectors and atomic positions until the force on each atom was less than 1 mRy/Å. In molecular crystals, van der Waals (vdW) forces are crucial, which dominate large-distance intermolecular interactions but are missing in standard DFT, with uncontrolled errors in the optimal geometry. A previous study using fingerprint analysis<sup>11</sup> demonstrated that molecular crystals relaxed with vdW–DF–ob86 functional have the best agreement with the experimental structure parameters. Therefore, in the present study, we employed the vdW–DF–ob86 (optB86b–vdW) scheme<sup>12-13</sup> enabling accurate treatments of weak interactions in crystals. The vibrational frequencies were calculated by Gaussian 03 using B3LYP/6-31+G\* for light elements and B3LYP/SDD for cadmium and iodide.<sup>14</sup>

## References

- (1) X-AREA:; Program for the Acquisition and Analysis of Data, version 1.30 Darmstadt, Germany (Stoe & Cie GmbH:), **2005**.
- (2) X-RED:; Program for Data Reduction and Absorption Correction, version 1.28b Darmstadt, Germany (Stoe & Cie GmbH:), **2005**.
- (3) X-SHAPE:; Program for Crystal Optimization for Numerical Absorption Correction, version 2.05 Darmstadt, Germany (Stoe & Cie GmbH:), **2004**.
- (4) Sheldrick, G. M., SHELX97; Program for Crystal Structure Solution, University of Göttingen: Göttingen Germany, **1997**.
- (5) Sheldrick, G. M., SHELX97; Program for Crystal Structure Refinement, University of Göttingen: Göttingen Germany, **1997**.

- (6) International Tables for X-ray Crystallography, V. C., Dordrecht, The Netherlands, Kluwer Academic Publisher: , **1995**.
- (7) X-STEP32:, Crystallographic Package, version 1.07b Darmstadt, Germany (Stoe & Cie GmbH:), **2000**.
- (8) D. Vanderbilt, *Phys. Rev. B*, 1990, **41**, 7892-7895.
- (9) D. Vanderbilt, *Phys. Rev. B*, 1985, **32**, 8412-8415.
- (10) H. J. Monkhorst and J. D. Pack, *Phys. Rev. B*, 1976, **13**, 5188-5192.
- (11) Y. Balmohammadi, H. R. Khavasi and S. S. Naghavi, *CrystEngComm*, 2020, **22**, 2756-2765.
- (12) K. Lee, É. D. Murray, L. Kong, B. I. Lundqvist and D. C. Langreth, *Phys. Rev. B*, 2010, **82**, 081101.
- (13) M. Dion, H. Rydberg, E. Schröder, D. C. Langreth and B. I. Lundqvist, *Phys. Rev. Lett.*, 2004, **92**, 246401.
- (14) M. Frisch, G. Trucks, H. Schlegel, G. Scuseria, M. Robb, J. Cheeseman, J. Montgomery Jr, T. Vreven, K. Kudin, J. Burant, gaussian 03, Gaussian, Inc.: Wallingford, CT, (2004).
